# Supplementary material
Source: Springer Nature journal article supplement (https://www.springermedizin.de/resource/supplementary/12960_2013_380_MOESM1_ESM.pdf/9569986)

100%  
90%  
80%  
70%  
60%  
50%  
40%  
30%  
20%  
10%  
0%

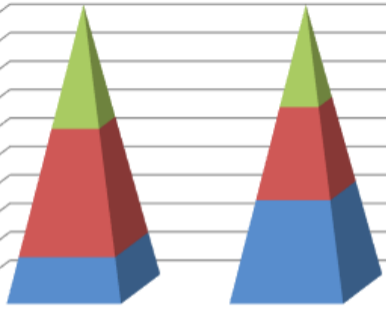

|                                 | England | Ireland |
|---------------------------------|---------|---------|
| Consultant                      | 36,965  | 2,475   |
| Registrar, Specialist Registrar | 38,134  | 2,252   |
| Other junior hospital doctor    | 13,860  | 2,499   |

Supplement: MOESM1 [file 9569986]
